# Supplementary material for: Specific IgA Enhances the Transcytosis and Excretion of Hepatitis A Virus
Source: PubMed Central journal article supplement (PMC4766440; doi:10.1038/srep21855), 2016-02-25

# Specific IgA Enhances the Transcytosis and Excretion of Hepatitis A Virus

Natalie A Counihan and David A Anderson

## Supplementary Figure 1

(A) IgA content of fecal samples in WT and KO mice. Total IgA concentration was determined from pre- and post-injection samples by ELISA for each group of mice. Data show mean IgA concentration (n = 6). (B) IgA content of bile in WT and KO mice. Total IgA was determined in bile samples 4 h after injection. Data show mean IgA concentration (n = 6). For both graphs, previously published normal ranges for both mouse types are shown in parentheses ( $\mu\text{g/g}$ )<sup>32</sup>. Unpaired t-tests were used to compare IgA content.

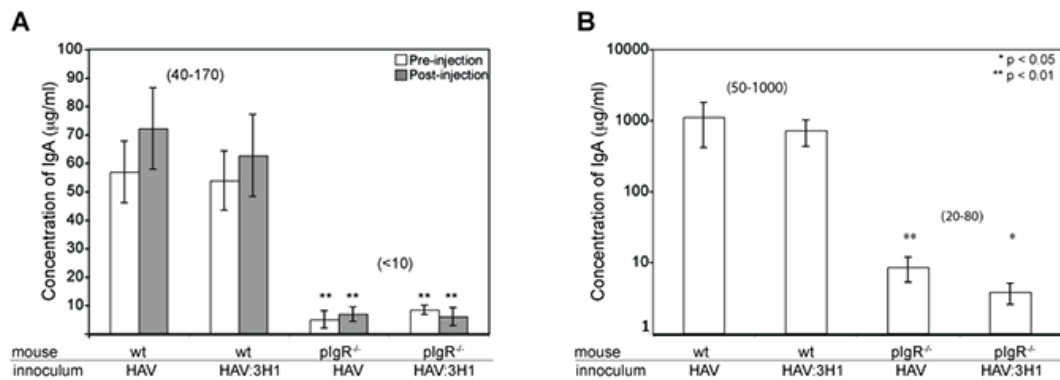

Supplement: srep21855-s1.pdf [file srep21855-s1.pdf]
